# Supplementary material for: Genomic Analysis of 18th-Century Kazakh Individuals and Their Oral Microbiome
Source: MDPI journal article supplement (doi:10.3390/biology10121324), 2021-12-14
Supplement: s1 [file s1]

## **Supplementary information**

### **Genomic analysis of 18th-century Kazakh individuals and their oral microbiome**

Anna White, Toni de-Dios, Pablo Carrión, Gian Luca Bonora, Laia Llovera, Elisabetta Cilli, Esther Lizano, Maral K. Khabdulina, Daniyar T. Tleugabulov, Iñigo Olalde, Tomàs Marquès-Bonet, François Balloux, Davide Pettener, Lucy van Dorp, Donata Luiselli, Carles Lalueza-Fox

Table S1. Available C14 dates of Kuygenzhar individuals; datings were done at the Centro di Datazione e Diagnostica (CEDAD) de l'Università del Salento.

| Sample name | Radiocarbon Age (BP)* | Year (CE)     | Lab code  | $\delta^{13}\text{C}$ (‰) |
|-------------|-----------------------|---------------|-----------|---------------------------|
| B2_B3       | 237 $\pm$ 40          | 1713 $\pm$ 40 | LTL20392A | -19.8 $\pm$ 0.5           |
| B2_B5       | 166 $\pm$ 40          | 1784 $\pm$ 40 | LTL20393A | -21.7 $\pm$ 0.5           |
| B2_B6       | 165 $\pm$ 40          | 1785 $\pm$ 40 | LTL20394A | -17.8 $\pm$ 0.5           |

\*1950 as present time

Table S2. Genetic sex determination of the five Kuygenzhar individuals.

| Individual | Nseqs    | NchrY+NchrX | NchrY | R <sub>y</sub> | SE     | 95% CI        | Assignment |
|------------|----------|-------------|-------|----------------|--------|---------------|------------|
| B2_B1      | 2346622  | 65198       | 6022  | 0.0924         | 0.0011 | 0.0901-0.0946 | XY         |
| B2_B3      | 11448368 | 575423      | 1530  | 0.0027         | 0.0001 | 0.0025-0.0028 | XX         |
| B2_B5      | 13838347 | 382064      | 35188 | 0.0921         | 0.0005 | 0.0912-0.093  | XY         |
| B2_B6      | 24913319 | 689321      | 63824 | 0.0926         | 0.0003 | 0.0919-0.0933 | XY         |
| B2_B7      | 23370803 | 640118      | 59474 | 0.0929         | 0.0004 | 0.0922-0.0936 | XY         |

Table S3. Estimates of contamination in the Kuygenzhar individuals.

| X Chromosome Heterozygosity |                        |                    | Mitochondrial Contamination |                |                |
|-----------------------------|------------------------|--------------------|-----------------------------|----------------|----------------|
| Sample                      | Contamination Estimate | Standard deviation | Average Contamination       | Lower Boundary | Upper Boundary |
| B2_B1                       | No data                | No data            | No data                     | No data        | No data        |
| B2_B3                       | NA (Female)            | NA (Female)        | 0                           | 0              | 95.00%         |
| B2_B5                       | 0.011171               | 5.789074e-03       | 0                           | 0              | 1.50%          |
| B2_B6                       | 0.002998               | 0.00540908         | 26.50%                      | 20.50%         | 32.50%         |
| B2_B7                       | 0.004636               | 0.00676443         | 0                           | 0              | 95.00%         |

\*With an insufficient amount of data contamination cannot be estimated or the range of possible contamination may be wide.

Table S4. Mitochondrial and Y-Chromosome haplogroups assigned to the Kuygenzhar individuals.

| Individual | Mitochondrial Haplotype | Y-Chromosome Haplotype |
|------------|-------------------------|------------------------|
| B2_B3      | G2a2                    | Female                 |
| B2_B5      | R2+13500                | G1b-L830               |
| B2_B6      | U5a1a1h                 | C2a1a3-M504            |
| B2_B7      | T2b28                   | C2                     |

Table S5. Two-way ancestry model for the Kuygenzhar individuals with qpAdm. Outgroups: Mbuti.DG, ONG.SG, Ami.DG, Mixe.DG, Israel\_Natufian\_published, Iran\_GanjDareh\_N, Turkey\_N, Italy\_North\_Villabruna\_HG.

| Target     | Ref1                          | Ref2               | p-value    | Coeff1           | Coeff2           |
|------------|-------------------------------|--------------------|------------|------------------|------------------|
| B2_B3      | Kyrgyzstan_Medieval_No mad.SG | Kazakhstan_H is.SG | 0.483<br>9 | 0.283 ±<br>0.027 | 0.717 ±<br>0.027 |
| B2_B5      | Kyrgyzstan_Medieval_No mad.SG | Kazakhstan_H is.SG | 0.065<br>8 | 0.286 ±<br>0.024 | 0.714 ±<br>0.024 |
| B2_B6      | Kyrgyzstan_Medieval_No mad.SG | Kazakhstan_H is.SG | 0.182<br>0 | 0.331 ±<br>0.042 | 0.558 ±<br>0.042 |
| B2_B7      | Kyrgyzstan_Medieval_No mad.SG | Kazakhstan_H is.SG | 0.209<br>6 | 0.283 ±<br>0.047 | 0.717 ±<br>0.047 |
| Kuygenzhar | Kyrgyzstan_Medieval_No mad.SG | Kazakhstan_H is.SG | 0.611<br>6 | 0.408 ±<br>0.020 | 0.592 ±<br>0.020 |

Table S6. Coverage for the three Red Complex bacteria (*Tannerella forsythia*, *Treponema denticola* and *Porphyromonas gingivalis*) in each individual sample.

| <b><i>Tannerella forsythia</i></b> |                      |                          |                  |
|------------------------------------|----------------------|--------------------------|------------------|
|                                    | <b>Average Depth</b> | <b>Reference Covered</b> | <b>Q30 Reads</b> |
| B2-B1                              | 0,0032               | 0.31%                    | 132              |
| B2-B3                              | 11,4159              | 66.29%                   | 391726           |
| B2-B5                              | 0,0806               | 7.23%                    | 3366             |
| B2-B6                              | 0,3282               | 23.18%                   | 12304            |
| B2-B7                              | 8,8889               | 83.23%                   | 318145           |

  

| <b><i>Treponema denticola</i></b> |                      |                          |                  |
|-----------------------------------|----------------------|--------------------------|------------------|
|                                   | <b>Average Depth</b> | <b>Reference Covered</b> | <b>Q30 Reads</b> |
| B2-B1                             | 0,0011               | 0.11%                    | 37               |
| B2-B3                             | 3,9331               | 84.68%                   | 110442           |
| B2-B5                             | 0,0236               | 2.31%                    | 689              |
| B2-B6                             | 0,1726               | 15.06%                   | 5240             |
| B2-B7                             | 0,9959               | 49.94%                   | 29052            |

  

| <b><i>Porphyromonas gingivalis</i></b> |                      |                          |                  |
|----------------------------------------|----------------------|--------------------------|------------------|
|                                        | <b>Average Depth</b> | <b>Reference Covered</b> | <b>Q30 Reads</b> |
| B2-B1                                  | 0,0026               | 0.25%                    | 74               |
| B2-B3                                  | 4,3217               | 82.07%                   | 116330           |
| B2-B5                                  | 0,0112               | 1.04%                    | 352              |
| B2-B6                                  | 0,0834               | 7.76%                    | 2663             |
| B2-B7                                  | 0,8203               | 32.76%                   | 22689            |



Table S7. List of all *Tannerella forsythia* samples used in the study. Origin of the sample is specified by their publication or their assembly identifier.

| Sample        | Approximate Dating | Country  | Species        | Average Depth | Dataset      | Article / Assembly ID |
|---------------|--------------------|----------|----------------|---------------|--------------|-----------------------|
| <b>ECO002</b> | -7500              | Spain    | H. sapiens     | 1,4058X       | Low Quality  | 1                     |
| <b>ECO004</b> | -7820              | Spain    | H. sapiens     | 0,532X        | Low Quality  | 1                     |
| <b>ESA008</b> | 1700               | Morocco  | H. sapiens     | 0,5769X       | Low Quality  | 1                     |
| <b>GOY005</b> | -41125             | Belgium  | H. neanderthal | 1,6819X       | Low Quality  | 1                     |
| <b>LIS001</b> | 1700               | Portugal | H. sapiens     | 1,3259X       | Low Quality  | 1                     |
| <b>LIS003</b> | 1700               | Portugal | H. sapiens     | 2,1888X       | Low Quality  | 1                     |
| <b>MOA001</b> | -2471              | Ethiopia | H. sapiens     | 0,7418X       | Low Quality  | 1                     |
| <b>OAK003</b> | -4208              |          | H. sapiens     | 1,2039X       | Low Quality  | 1                     |
| <b>OAK005</b> | -4600              |          | H. sapiens     | 3,2383X       | Low Quality  | 1                     |
| <b>OFN001</b> | -6291              | Germany  | H. sapiens     | 0,7768X       | Low Quality  | 1                     |
| <b>PYK001</b> | 1800               | South    | H. sapiens     | 0,6557X       | Low Quality  | 1                     |
| <b>PYK002</b> | 1800               |          | H. sapiens     | 4,9867X       | High Quality | 1                     |
| <b>PYK003</b> | 1800               |          | H. sapiens     | 3,155X        | Low Quality  | 1                     |
| <b>PYK005</b> | 1800               |          | H. sapiens     | 1,3959X       | Low Quality  | 1                     |
| <b>TAF008</b> | -12000             | Morocco  | H. sapiens     | 1,9884X       | Low Quality  | 1                     |
| <b>VLC001</b> | 2016               | Spain    | H. sapiens     | 29,8478X      | High Quality | 1                     |
| <b>VLC002</b> | 2016               | Spain    | H. sapiens     | 1,1704X       | Low Quality  | 1                     |
| <b>VLC004</b> | 2016               | Spain    | H. sapiens     | 2,1251X       | Low Quality  | 1                     |
| <b>VLC005</b> | 2016               | Spain    | H. sapiens     | 19,3391X      | High Quality | 1                     |
| <b>VLC008</b> | 2016               | Spain    | H. sapiens     | 13,7029X      | High Quality | 1                     |
| <b>VLC009</b> | 2016               | Spain    | H. sapiens     | 5,9612X       | High         | 1                     |

|                       |        |            |             |          | Quality      |             |
|-----------------------|--------|------------|-------------|----------|--------------|-------------|
| <b>B61</b>            | 1050   | Germany    | H. sapiens  | 4,1792X  | High Quality | 2           |
| <b>G12</b>            | 1050   | Germany    | H. sapiens  | 4,0269X  | High Quality | 2           |
| <b>CS21</b>           | 1812   | England    | H. sapiens  | 5,2219X  | High Quality | 2           |
| <b>CS40</b>           | 1812   | England    | H. sapiens  | 6,5113X  | High Quality | 2           |
| <b>B2_B3</b>          | 1713   | Kazakhstan | H. sapiens  | 11,4159X | High Quality | This study  |
| <b>B2_B6</b>          | 1785   | Kazakhstan | H. sapiens  | 0,3282X  | Low Quality  | This study  |
| <b>B2_B7</b>          | 1750   | Kazakhstan | H. sapiens  | 8,8889X  | High Quality | This study  |
| <b>CA13</b>           | -565   | Mexico     | H. sapiens  | 0,2039X  | High Quality | 3           |
| <b>TO-2417Q</b>       | 1250   | Mexico     | H. sapiens  | 14,985X  | High Quality | 3           |
| <b>TO-2417J</b>       | -900   | Mexico     | H. sapiens  | 8,4118X  | High Quality | 3           |
| <b>TO3330</b>         | -700   | Mexico     | H. sapiens  | 4,3302X  | Low Quality  | 3           |
| <b>TLA01</b>          | 1487   | Mexico     | H. sapiens  | 3,378X   | Low Quality  | 3           |
| <b>TLA22</b>          | 1455   | Mexico     | H. sapiens  | 2,7067X  | Low Quality  | 3           |
| <b>HSJN194</b>        | 1548   | Mexico     | H. sapiens  | 0,84X    | Low Quality  | 3           |
| <b>HSJN240</b>        | 1525   | Mexico     | H. sapiens  | 2,2505X  | Low Quality  | 3           |
| <b>CO09</b>           | 1800   | Mexico     | H. sapiens  | 0,1489X  | High Quality | 3           |
| <b>CO20</b>           | 1800   | Mexico     | H. sapiens  | 2,5809X  | High Quality | 3           |
| <b>3313</b>           | ~ 2010 | Japan      | H. sapiens  | Assembly | High Quality | ASM154787v1 |
| <b>UB20</b>           | 2013   | USA        | H. sapiens  | Assembly | High Quality | TFUB20      |
| <b>KS16</b>           | ~ 2010 | Japan      | H. sapiens  | Assembly | High Quality | ASM154785v1 |
| <b>OH2617_COT-023</b> | 2012   | England    | Canis lupus | Assembly | High Quality | ASM386002v1 |
| <b>UB22</b>           | 2013   | USA        | H. sapiens  | Assembly | High Quality | TFUB22      |
| <b>UB4</b>            | 2013   | USA        | H. sapiens  | Assembly | High Quality | TFUB4       |
| <b>WW10960</b>        | ~ 2010 | England    | H. sapiens  | Assembly | High Quality | ASM252929v1 |
| <b>WW11663</b>        | ~ 2010 | England    | H. sapiens  | Assembly | High Quality | ASM252908v1 |

|                                                                                                                                                                                                                                |      |        |            |          |              |             |
|--------------------------------------------------------------------------------------------------------------------------------------------------------------------------------------------------------------------------------|------|--------|------------|----------|--------------|-------------|
| <b>92A2</b>                                                                                                                                                                                                                    | 1986 | USA    | H. sapiens | Assembly | High Quality | ASM23821v1  |
| <b>9610</b>                                                                                                                                                                                                                    | 1990 | USA    | H. sapiens | Assembly | High Quality | ASM193878v1 |
| <b>VE42</b>                                                                                                                                                                                                                    | 150  | Mexico | H. sapiens | 1,0167X  | Low Quality  | 3           |
| <b>UAQG</b>                                                                                                                                                                                                                    | NA   | Mexico | H. sapiens | 1,88X    | Low Quality  | 3           |
| <b>Article</b>                                                                                                                                                                                                                 |      |        |            |          |              | <b>ID</b>   |
| J. A. F. Yates, et al., The evolution and changing ecology of the African hominid oral microbiome. <i>Proc. Natl. Acad. Sci. U. S. A.</i> 118, e2021655118 (2021).                                                             |      |        |            |          |              | 1           |
| C. Warinner, et al., Pathogens and host immunity in the ancient human oral cavity. <i>Nat. Genet.</i> 46, 336–344 (2014).                                                                                                      |      |        |            |          |              | 2           |
| M. Bravo-Lopez, et al., Paleogenomic insights into the red complex bacteria <i>Tannerella forsythia</i> in Pre-Hispanic and Colonial individuals from Mexico. <i>Philos. Trans. R. Soc. B Biol. Sci.</i> 375, 20190580 (2020). |      |        |            |          |              | 3           |

Table S8. List of recombinant tracks detected using ClonalFrameML, with their starting and finishing position.

| Start  | End    |  | Start   | End     |  | Start   | End     |
|--------|--------|--|---------|---------|--|---------|---------|
| 495    | 42003  |  | 1046209 | 1046347 |  | 2042157 | 2054741 |
| 42690  | 45502  |  | 1048396 | 1050841 |  | 2055424 | 2076427 |
| 46141  | 64412  |  | 1053170 | 1053473 |  | 2085896 | 2086222 |
| 100903 | 100953 |  | 1058472 | 1059515 |  | 2103969 | 2133181 |
| 114237 | 115255 |  | 1060516 | 1086407 |  | 2140569 | 2151453 |
| 135232 | 139335 |  | 1088210 | 1106270 |  | 2152592 | 2160338 |
| 142200 | 142257 |  | 1109372 | 1123511 |  | 2162869 | 2197942 |
| 145176 | 145210 |  | 1124705 | 1138188 |  | 2199205 | 2203617 |
| 148132 | 153018 |  | 1141413 | 1142987 |  | 2213970 | 2215754 |
| 153048 | 154075 |  | 1145491 | 1146206 |  | 2217182 | 2232911 |
| 156187 | 156979 |  | 1165926 | 1184285 |  | 2245609 | 2255734 |
| 158160 | 166016 |  | 1185267 | 1187297 |  | 2261568 | 2291274 |
| 169282 | 183681 |  | 1187930 | 1190060 |  | 2292789 | 2306979 |
| 187493 | 190897 |  | 1190634 | 1191098 |  | 2309228 | 2318838 |
| 192877 | 226071 |  | 1191287 | 1196328 |  | 2321900 | 2322779 |
| 238155 | 260883 |  | 1199660 | 1201687 |  | 2323325 | 2323671 |
| 263953 | 266293 |  | 1203411 | 1210691 |  | 2326953 | 2333591 |
| 268327 | 273990 |  | 1212090 | 1233925 |  | 2335333 | 2338584 |
| 275203 | 294419 |  | 1242769 | 1252063 |  | 2340784 | 2345121 |
| 294986 | 295030 |  | 1254613 | 1261003 |  | 2345595 | 2350084 |
| 297503 | 298611 |  | 1272489 | 1293981 |  | 2354121 | 2357406 |
| 300217 | 300359 |  | 1301645 | 1312692 |  | 2362546 | 2386686 |
| 302694 | 304369 |  | 1313783 | 1314593 |  | 2391257 | 2394264 |
| 304959 | 305255 |  | 1364708 | 1365255 |  | 2404420 | 2423556 |
| 307827 | 310347 |  | 1365651 | 1369744 |  | 2424618 | 2440301 |
| 311523 | 348875 |  | 1369970 | 1370636 |  | 2440750 | 2461033 |
| 351850 | 357945 |  | 1371677 | 1371815 |  | 2475000 | 2492353 |
| 360472 | 361291 |  | 1374127 | 1380070 |  | 2498530 | 2498759 |
| 362859 | 363922 |  | 1380278 | 1380340 |  | 2500093 | 2500309 |
| 379253 | 379289 |  | 1382103 | 1423167 |  | 2506640 | 2507786 |
| 393485 | 395928 |  | 1425471 | 1426725 |  | 2513438 | 2536624 |
| 396704 | 403118 |  | 1429045 | 1447263 |  | 2537281 | 2543437 |
| 404488 | 415604 |  | 1450559 | 1450787 |  | 2544042 | 2544174 |
| 416314 | 444178 |  | 1453221 | 1454571 |  | 2552290 | 2561852 |
| 445571 | 466803 |  | 1454848 | 1469482 |  | 2563765 | 2585038 |
| 471230 | 485410 |  | 1471326 | 1476997 |  | 2586720 | 2591367 |
| 487469 | 500386 |  | 1478868 | 1493901 |  | 2597332 | 2611702 |
| 502339 | 535295 |  | 1507059 | 1507322 |  | 2617236 | 2619851 |
| 536533 | 539293 |  | 1517561 | 1518761 |  | 2628837 | 2652861 |
| 540631 | 546741 |  | 1519394 | 1521821 |  | 2653755 | 2655195 |

|              |            |  |              |            |  |              |            |
|--------------|------------|--|--------------|------------|--|--------------|------------|
| 548650       | 548767     |  | 1529704      | 1559344    |  | 2657130      | 2679712    |
| <b>Start</b> | <b>End</b> |  | <b>Start</b> | <b>End</b> |  | <b>Start</b> | <b>End</b> |
| 550909       | 561035     |  | 1566285      | 1568910    |  | 2681269      | 2691756    |
| 562379       | 566808     |  | 1572051      | 1577747    |  | 2697159      | 2698196    |
| 573503       | 590840     |  | 1580285      | 1581435    |  | 2698336      | 2698441    |
| 591658       | 608563     |  | 1587660      | 1598007    |  | 2703106      | 2703616    |
| 610006       | 611963     |  | 1599090      | 1604157    |  | 2703911      | 2704389    |
| 614990       | 616577     |  | 1605306      | 1625158    |  | 2710977      | 2711227    |
| 619131       | 621962     |  | 1626046      | 1641802    |  | 2714677      | 2735206    |
| 623084       | 624652     |  | 1643873      | 1646372    |  | 2735317      | 2735479    |
| 627380       | 627508     |  | 1648289      | 1674909    |  | 2739084      | 2739340    |
| 629966       | 642231     |  | 1676010      | 1678624    |  | 2739536      | 2739764    |
| 649693       | 653296     |  | 1682441      | 1683494    |  | 2741623      | 2761322    |
| 656857       | 664322     |  | 1685725      | 1700222    |  | 2764342      | 2795801    |
| 692086       | 697707     |  | 1700279      | 1714258    |  | 2797886      | 2823519    |
| 698902       | 731250     |  | 1718956      | 1721516    |  | 2825382      | 2828786    |
| 732219       | 733113     |  | 1722496      | 1753517    |  | 2829847      | 2831930    |
| 742740       | 743134     |  | 1755728      | 1755749    |  | 2833057      | 2835106    |
| 750332       | 751393     |  | 1756612      | 1756984    |  | 2836227      | 2841173    |
| 757535       | 771040     |  | 1757404      | 1757674    |  | 2842993      | 2852152    |
| 771902       | 772029     |  | 1758777      | 1764076    |  | 2853747      | 2854302    |
| 772176       | 773039     |  | 1765766      | 1806002    |  | 2855765      | 2880567    |
| 773393       | 774178     |  | 1806388      | 1806890    |  | 2896469      | 2896495    |
| 775359       | 784835     |  | 1807419      | 1809878    |  | 2896529      | 2899218    |
| 785021       | 786248     |  | 1818634      | 1819218    |  | 2900627      | 2993497    |
| 789155       | 791808     |  | 1820523      | 1820586    |  | 2994603      | 3001606    |
| 794166       | 794794     |  | 1822643      | 1824295    |  | 3002769      | 3006671    |
| 796588       | 803854     |  | 1826331      | 1827255    |  | 3011082      | 3041429    |
| 810686       | 821600     |  | 1827574      | 1850059    |  | 3043523      | 3058751    |
| 822665       | 829244     |  | 1851071      | 1860715    |  | 3060350      | 3094131    |
| 832767       | 840408     |  | 1862458      | 1862617    |  | 3095993      | 3110475    |
| 843902       | 848701     |  | 1864391      | 1864568    |  | 3118616      | 3140429    |
| 850554       | 851372     |  | 1866399      | 1871097    |  | 3141795      | 3141917    |
| 852914       | 861170     |  | 1874337      | 1884027    |  | 3144933      | 3170919    |
| 863100       | 863820     |  | 1887513      | 1913425    |  | 3174803      | 3207929    |
| 864617       | 896228     |  | 1913693      | 1913765    |  | 3209014      | 3215048    |
| 899239       | 911309     |  | 1914208      | 1929115    |  | 3218622      | 3224792    |
| 917076       | 918085     |  | 1930750      | 1938771    |  | 3227639      | 3231348    |
| 921325       | 940699     |  | 1940682      | 1964710    |  | 3238676      | 3242254    |
| 960293       | 967372     |  | 1968094      | 1968702    |  | 3249201      | 3253628    |
| 970584       | 991072     |  | 1970913      | 1971591    |  | 3260687      | 3262342    |
| 993255       | 994323     |  | 1987063      | 1995077    |  | 3267531      | 3268743    |
| 994326       | 996698     |  | 1996249      | 2004724    |  | 3278240      | 3279096    |
| 997349       | 1024774    |  | 2008590      | 2014252    |  | 3313545      | 3330813    |
| 1026165      | 1026391    |  | 2015788      | 2028584    |  | 3333016      | 3342298    |

|              |            |  |              |            |  |              |            |
|--------------|------------|--|--------------|------------|--|--------------|------------|
| 1028476      | 1032313    |  | 2029357      | 2031575    |  | 3344574      | 3357610    |
| <b>Start</b> | <b>End</b> |  | <b>Start</b> | <b>End</b> |  | <b>Start</b> | <b>End</b> |
| 1033462      | 1038518    |  | 2033202      | 2034080    |  | 3363873      | 3373352    |
| 1039629      | 1044802    |  | 2034405      | 2039790    |  | 3374472      | 3405521    |

Table S9. Dating of the *T. forsythia* phylogeny nodes estimated using BactDating, including the upper and lower confidence interval boundaries ( $\pm$  95%).

| <b>Node</b> | <b>Date</b> | <b>Lower<br/>95% CI</b> | <b>Upper<br/>95% CI</b> | <b>Node</b> | <b>Date</b> | <b>Lower<br/>95% CI</b> | <b>Upper<br/>95% CI</b> |
|-------------|-------------|-------------------------|-------------------------|-------------|-------------|-------------------------|-------------------------|
| [1,]        | 1800        | 1800                    | 1800                    | [24,]       | -11209,9    | -20219,4                | -2200,47                |
| [2,]        | 2010        | 2010                    | 2010                    | [25,]       | -3585,56    | -6121,01                | -1050,11                |
| [3,]        | 2010        | 2010                    | 2010                    | [26,]       | -2149,65    | -3387,01                | -912,289                |
| [4,]        | 1990        | 1990                    | 1990                    | [27,]       | -620,43     | -1802,55                | 561,6907                |
| [5,]        | 2016        | 2016                    | 2016                    | [28,]       | -198,473    | -1176,13                | 779,1804                |
| [6,]        | 2016        | 2016                    | 2016                    | [29,]       | 125,402     | -640,669                | 891,4741                |
| [7,]        | 2013        | 2013                    | 2013                    | [30,]       | 597,538     | 180,6718                | 1014,405                |
| [8,]        | 2013        | 2013                    | 2013                    | [31,]       | 786,88      | 526,9154                | 1046,844                |
| [9,]        | 2016        | 2016                    | 2016                    | [32,]       | 1178,22     | 795,0726                | 1561,361                |
| [10,]       | 2010        | 2010                    | 2010                    | [33,]       | 1321,83     | 952,3872                | 1691,273                |
| [11,]       | 2010        | 2010                    | 2010                    | [34,]       | 1410,33     | 1072,437                | 1748,225                |
| [12,]       | 2013        | 2013                    | 2013                    | [35,]       | 1510,93     | 1239,833                | 1782,02                 |
| [13,]       | 1812        | 1812                    | 1812                    | [36,]       | 1582,54     | 1338,029                | 1827,059                |
| [14,]       | 2010        | 2010                    | 2010                    | [37,]       | 1685,38     | 1480,073                | 1890,681                |
| [15,]       | 1812        | 1812                    | 1812                    | [38,]       | 1789,23     | 1620,357                | 1958,108                |
| [16,]       | 1050        | 1050                    | 1050                    | [39,]       | 1892,2      | 1777,266                | 2007,137                |
| [17,]       | 2016        | 2016                    | 2016                    | [40,]       | 1855,74     | 1724,251                | 1987,235                |
| [18,]       | 1750        | 1750                    | 1750                    | [41,]       | 1843,49     | 1678,145                | 2008,837                |
| [19,]       | 1713        | 1713                    | 1713                    | [42,]       | 1701,63     | 1471,611                | 1931,645                |
| [20,]       | 1050        | 1050                    | 1050                    | [43,]       | 1800,69     | 1616,055                | 1985,326                |
| [21,]       | -900        | -900                    | -900                    | [44,]       | 1900,82     | 1793,2                  | 2008,436                |
| [22,]       | 1250        | 1250                    | 1250                    | [45,]       | 1847,48     | 1688,939                | 2006,021                |
| [23,]       | 2010        | 2010                    | 2010                    |             |             |                         |                         |

Table S10. All genes of *Tannerella forsythia* used to determine the presence or absence of virulence, antibiotic resistance and glycosylation genes.

| <b>Annotation 92A2</b> | <b>Gene name</b> | <b>Gene function</b> | <b>Gene description</b>                          |
|------------------------|------------------|----------------------|--------------------------------------------------|
| <b>BFO_RS07215</b>     | tfsB             | Virulence gene       | S-layer glycoprotein subunit TfsB                |
| <b>BFO_RS15610</b>     | tfsA             | Virulence gene       | S-layer glycoprotein subunit TfsA                |
| <b>BFO_2272</b>        | susB             | Virulence gene       | alpha-glucosidase                                |
| <b>BFO_1210</b>        | siaHI            | Virulence gene       | oxidoreductase                                   |
| <b>AB001892.1</b>      | prtH             | Virulence gene       |                                                  |
| <b>BFO_2207</b>        | nanH             | Virulence gene       | sialidase                                        |
| <b>BFO_RS15140</b>     | miropsin-2       | Virulence gene       |                                                  |
| <b>BFO_RS14385</b>     | miropsin-1       | Virulence gene       |                                                  |
| <b>BFO_RS15130</b>     | mirolysin        | Virulence gene       |                                                  |
| <b>BFO_RS15675</b>     | mirolase         | Virulence gene       |                                                  |
| <b>BFO_RS07535</b>     | methylglyoxal    | Virulence gene       |                                                  |
|                        | karilysin        | Virulence gene       |                                                  |
| <b>BFO_1923</b>        | hexA             | Virulence gene       | beta-hexosaminidase                              |
| <b>BFO_1437</b>        | groEL            | Virulence gene       | 60 kDa chaperone family                          |
| <b>BFO_2737</b>        | fucO             | Virulence gene       | alpha-L-fucosidase                               |
| <b>BFO_RS05090</b>     | forsilysin       | Virulence gene       |                                                  |
| <b>BFO_2068</b>        | enolase          | Virulence gene       | 2-phospho-D-glycerate in glycolysis              |
|                        | bspA_2           | Virulence gene       |                                                  |
| <b>BFO_RS14480</b>     | bspA             | Virulence gene       | leucine-rich-repeat family virulence factor BspA |
| <b>BFO_2182</b>        | bglX             | Virulence gene       | beta-D-glucoside glucohydrolase                  |
| <b>BFO_2553</b>        | beta-Gal_3       | Virulence gene       | beta-galactosidase                               |
| <b>BFO_0450</b>        | beta-Gal_2       | Virulence gene       | beta-galactosidase                               |
| <b>BFO_1381</b>        | beta-Gal_1       | Virulence gene       | glycoside hydrolase family 2                     |
| <b>BFO_2947</b>        | alpha-Man_2      | Virulence gene       | alpha-mannosidase                                |
| <b>BFO_0315</b>        | alpha-Man_1      | Virulence gene       | alpha-mannosidase                                |
| <b>BFO_3112</b>        | abfA             | Virulence gene       |                                                  |
| <b>BFO_1930</b>        | TF2930           | Virulence gene       | glutamyl-tRNA synthetase                         |
| <b>BFO_1924</b>        | TF2926           | Virulence gene       | serine hydroxymethyltransferase                  |
| <b>BFO_1388</b>        | TF2392           | Virulence gene       | alpha-galactosidase                              |
| <b>BFO_1007</b>        | TF2014           | Virulence gene       | peptidase S9                                     |

|                 |        |                       |                                                    |
|-----------------|--------|-----------------------|----------------------------------------------------|
| <b>BFO_0711</b> | TF1723 | Virulence gene        | alpha-rhamnosidase                                 |
| <b>BFO_0705</b> | TF1717 | Virulence gene        | DNA mismatch repair protein MutS                   |
| <b>BFO_1055</b> | TF1705 | Virulence gene        | transcriptional regulator                          |
| <b>BFO_0574</b> | TF1589 | Virulence gene        | Tanf_05795                                         |
| <b>BFO_0490</b> | TF1502 | Virulence gene        | glycoside hydrolase                                |
| <b>BFO_0418</b> | TF1439 | Virulence gene        |                                                    |
| <b>BFO_0395</b> | TF1416 | Virulence gene        | starch-binding protein                             |
| <b>BFO_0300</b> | TF1320 | Virulence gene        | glycoside hydrolase                                |
| <b>BFO_3356</b> | TF1012 | Virulence gene        | lysyl-tRNA synthetase                              |
| <b>BFO_3298</b> | TF0960 | Virulence gene        | beta-galactosidase                                 |
| <b>BFO_3080</b> | TF0751 | Virulence gene        | peptidase S9                                       |
| <b>BFO_2968</b> | TF0636 | Virulence gene        | beta-galactosidas                                  |
| <b>BFO_2686</b> | TF0371 | Virulence gene        | beta-glycosidase                                   |
| <b>BFO_2183</b> | TF0015 | Virulence gene        | membrane protein                                   |
| <b>BFO_0996</b> | folA   | Antibiotic resistance | Dihydrofolate reductase                            |
| <b>BFO_1541</b> | rpsL   | Antibiotic resistance | SSU ribosomal protein S12p                         |
| <b>BFO_1543</b> | fusA   | Antibiotic resistance | Translation elongation factor G                    |
| <b>BFO_1544</b> | rpsJ   | Antibiotic resistance | SSU ribosomal protein S10p                         |
| <b>BFO_2029</b> | dxr    | Antibiotic resistance | 1-deoxy-D-xylulose 5-phosphate reductoisomerase    |
| <b>BFO_2698</b> | rho    | Antibiotic resistance | Transcription termination factor Rho               |
| <b>BFO_2869</b> | rmsG   | Antibiotic resistance | 16S rRNA (guanine(527)-N(7))-methyltransferase     |
| <b>BFO_1132</b> |        | Antibiotic resistance | 3-oxoacyl-[acyl-carrier-protein] synthase          |
| <b>BFO_1235</b> | tetQ   | Antibiotic resistance | Tetracycline resistance, ribosomal protection type |
| <b>BFO_1091</b> | fabF   | Antibiotic resistance | 3-oxoacyl-[acyl-carrier-protein] synthase, KASII   |
| <b>BFO_1348</b> | folP   | Antibiotic resistance | Dihydropteroate synthase                           |
| <b>BFO_1939</b> | tuf    | Antibiotic resistance | Translation elongation factor Tu                   |
| <b>BFO_1947</b> | rpoB   | Antibiotic resistance | DNA-directed RNA polymerase beta subunit           |
| <b>BFO_1948</b> | rpOC   | Antibiotic resistance | DNA-directed RNA polymerase beta' subunit          |
| <b>BFO_2280</b> | OxyR   | Antibiotic resistance | Hydrogen peroxide-inducible genes activator        |
| <b>BFO_3290</b> |        | Antibiotic resistance | D-alanine--D-alanine ligase                        |



|                    |      |                                          |                                                       |
|--------------------|------|------------------------------------------|-------------------------------------------------------|
| <b>BFO_0550</b>    |      | Antibiotic resistance                    | Glycerophosphoryl diester phosphodiesterase           |
| <b>BFO_1314</b>    |      | Antibiotic resistance                    | 3-oxoacyl-[acyl-carrier-protein] synthase, KASII      |
| <b>BFO_1782</b>    |      | Antibiotic resistance                    | Enoyl-[acyl-carrier-protein] reductase [NADH]         |
| <b>BFO_2690</b>    |      | Antibiotic resistance                    | Glycerophosphoryl diester phosphodiesterase           |
| <b>BFO_1561</b>    | rplF | Antibiotic resistance and essential gene | LSU ribosomal protein                                 |
| <b>BFO_1695</b>    | gyrB | Antibiotic resistance and essential gene | DNA gyrase subunit B                                  |
| <b>BFO_2872</b>    | gyrA | Antibiotic resistance and essential gene | DNA gyrase subunit A                                  |
| <b>BFO_2936</b>    | ileS | Antibiotic resistance and essential gene | Isoleucyl-tRNA synthetase                             |
| <b>BFO_RS00485</b> |      | Glycosylation gene                       | glycosyltransferase group 1 family protein            |
| <b>BFO_RS00535</b> |      | Glycosylation gene                       | hypothetical protein                                  |
| <b>BFO_RS00550</b> |      | Glycosylation gene                       | glycosyl transferase                                  |
| <b>BFO_RS02100</b> |      | Glycosylation gene                       | hypothetical protein                                  |
| <b>BFO_RS02105</b> |      | Glycosylation gene                       | penicillin-binding protein 1C                         |
| <b>BFO_RS02135</b> |      | Glycosylation gene                       | mannosyltransferase                                   |
| <b>BFO_RS02420</b> |      | Glycosylation gene                       | glycosyl transferase family 1                         |
| <b>BFO_RS02430</b> |      | Glycosylation gene                       | glycosyl transferase family 1                         |
| <b>BFO_RS02435</b> |      | Glycosylation gene                       | hypothetical protein                                  |
| <b>BFO_RS08625</b> |      | Glycosylation gene                       | hypothetical protein                                  |
| <b>BFO_RS08630</b> |      | Glycosylation gene                       | glycosyl transferease family 2                        |
| <b>BFO_RS14090</b> |      | Glycosylation gene                       | hypothetical protein                                  |
| <b>BFO_RS08670</b> |      | Glycosylation gene                       | hypothetical protein                                  |
| <b>BFO_RS08675</b> |      | Glycosylation gene                       | glycosyltransferase group 1 family protein            |
| <b>BFO_RS08680</b> |      | Glycosylation gene                       | glycosyl transferase                                  |
| <b>BFO_RS10550</b> |      | Glycosylation gene                       | hypothetical protein                                  |
| <b>BFO_RS10555</b> |      | Glycosylation gene                       | UDP-N-acetylglucosamine 2-epimerase (non-hydrolyzing) |
| <b>BFO_RS10600</b> |      | Glycosylation gene                       | glycosyl transferase                                  |

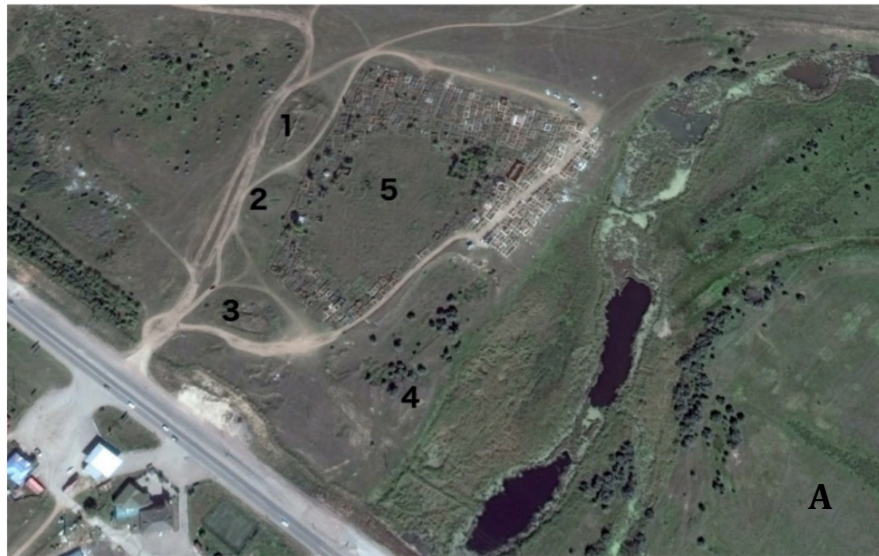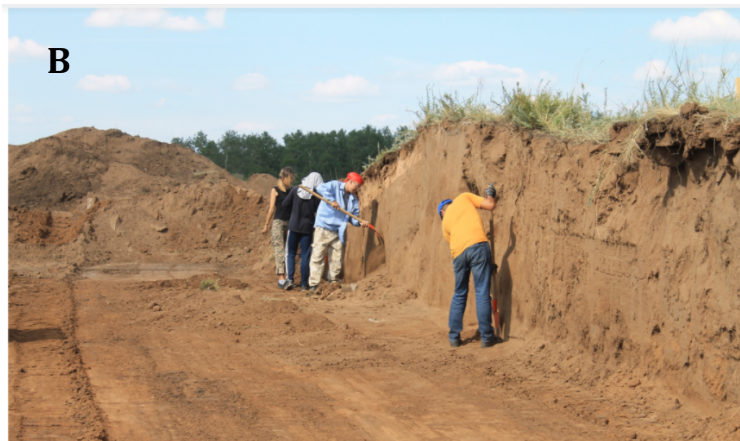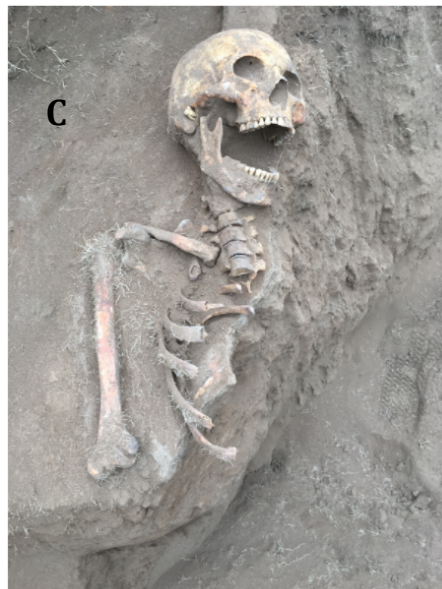

Figure S1. Excavation of the five individuals in Kuygenzhar, Kazakhstan. **A.** Aerial photo of the burial grounds, the kurgan excavated is located at 2. **B.** Excavation of the kurgan number 2 (1,3,4 and 5 numbers correspond to other, different barrows). **C.** One of the five individuals that was excavated.

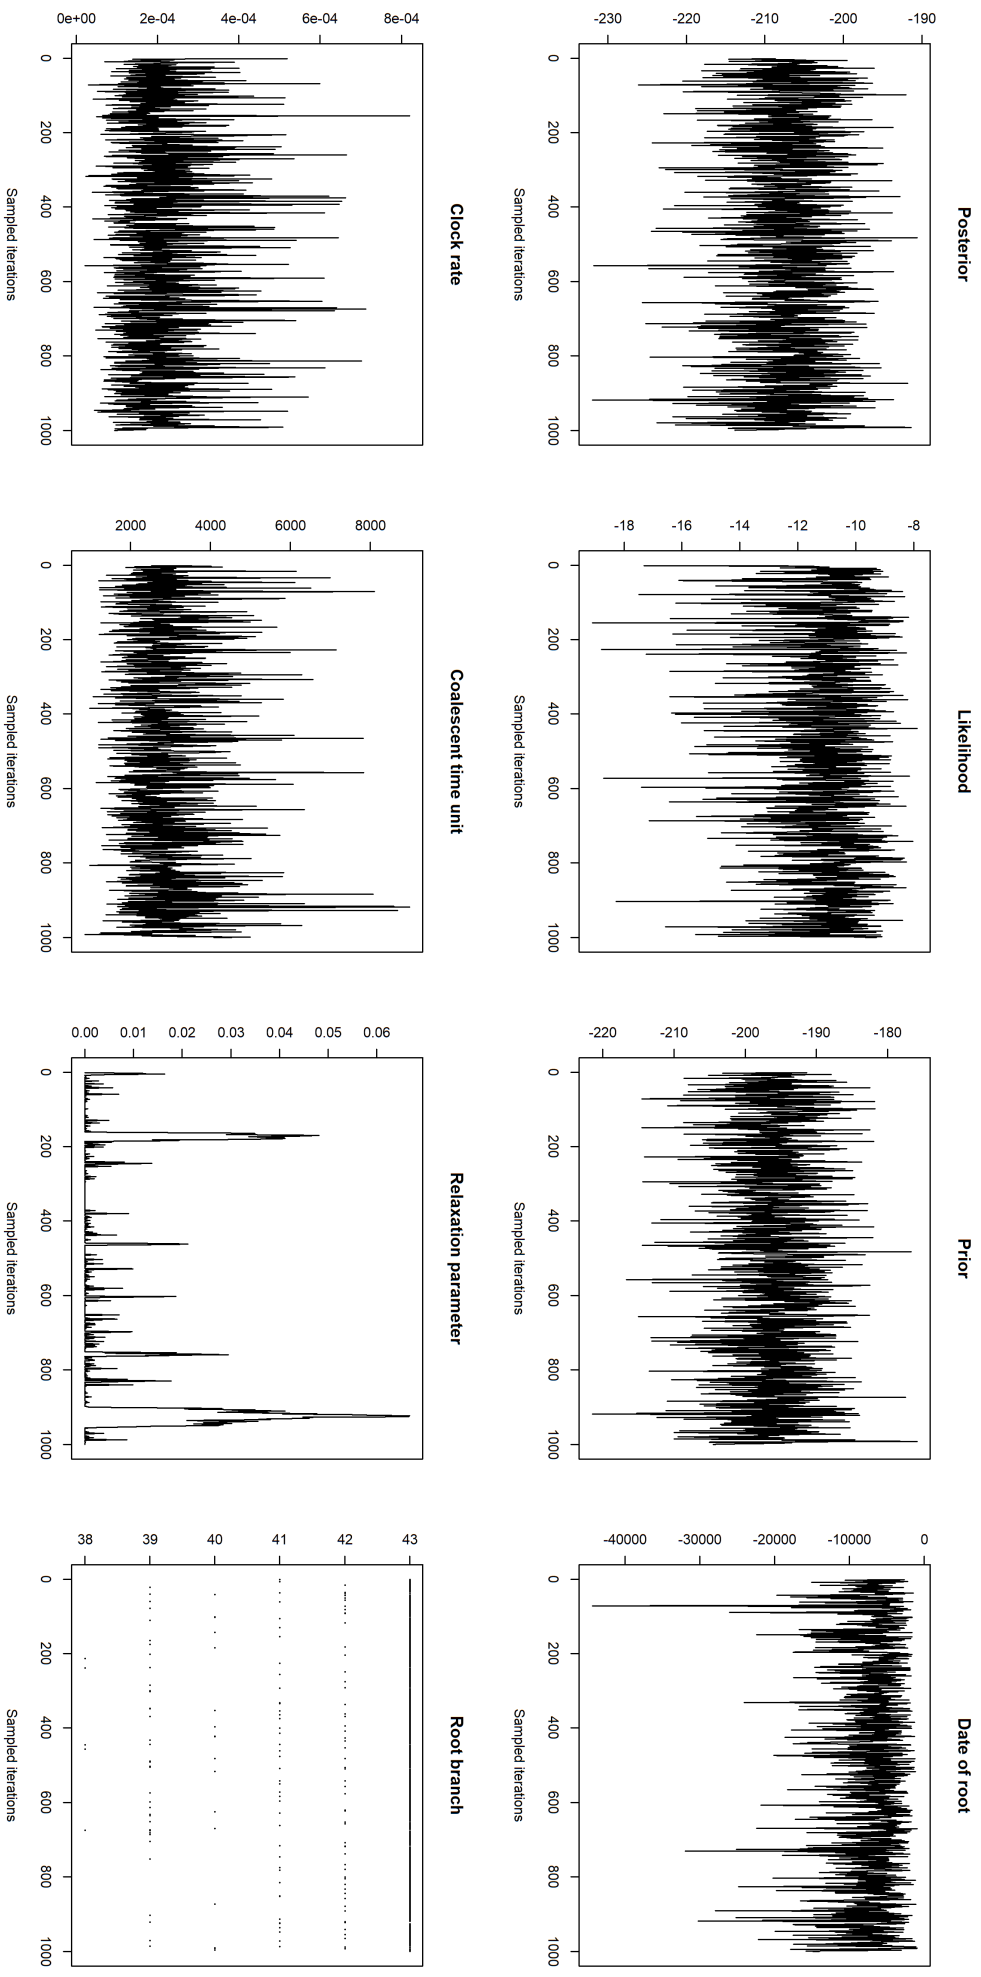

Figure S.2. MCMC Parameters convergence after 10,000,000 iterations

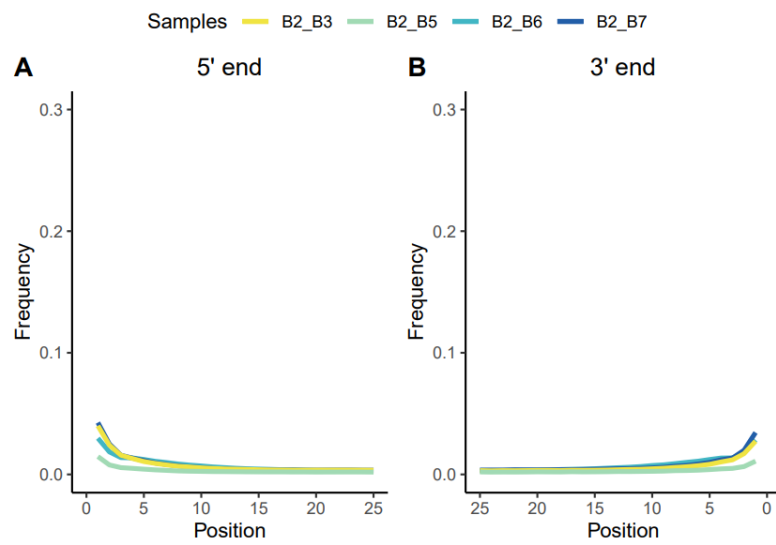

Figure S3. Post-mortem damage at the end of the DNA sequences. The frequency of substitutions C to T, at the 5' end (**A**), and G to A, at the 3' end (**B**). The substitutions at the end of DNA molecules show a damage pattern consistent with ancient DNA.

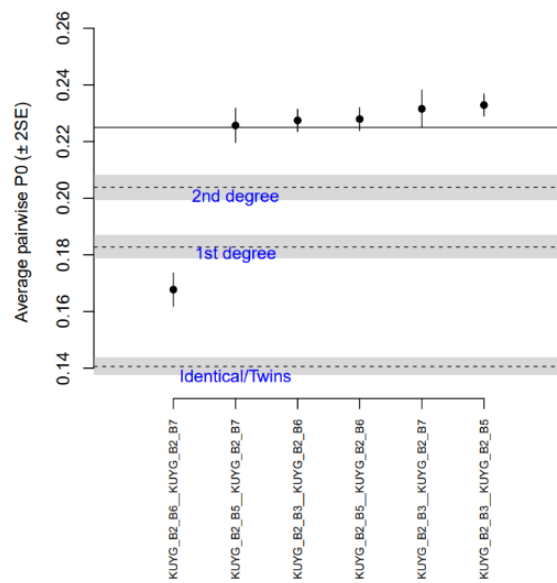

Figure S4. Kinship analysis between B2\_B3, B2\_B5, B\_6 and B2\_B7 identifies a first-degree relationship between B2\_B6 and B2\_B7. Since they are both male and have a different mitochondrial haplogroup they can be identified as father and son.

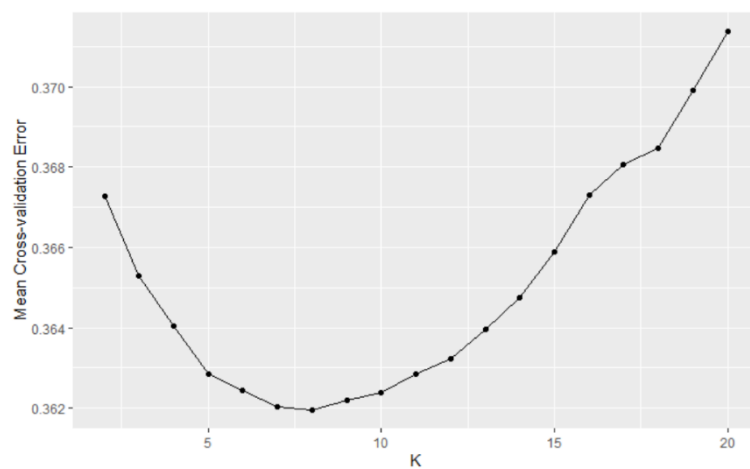

Figure S5. Mean cross-validation error to determine the most likely value of K for the ADMIXTURE analysis. These mean cross-validation errors indicate K=7 or K=8 as the best supported value for K of those tested.

## Kuygenzhar samples

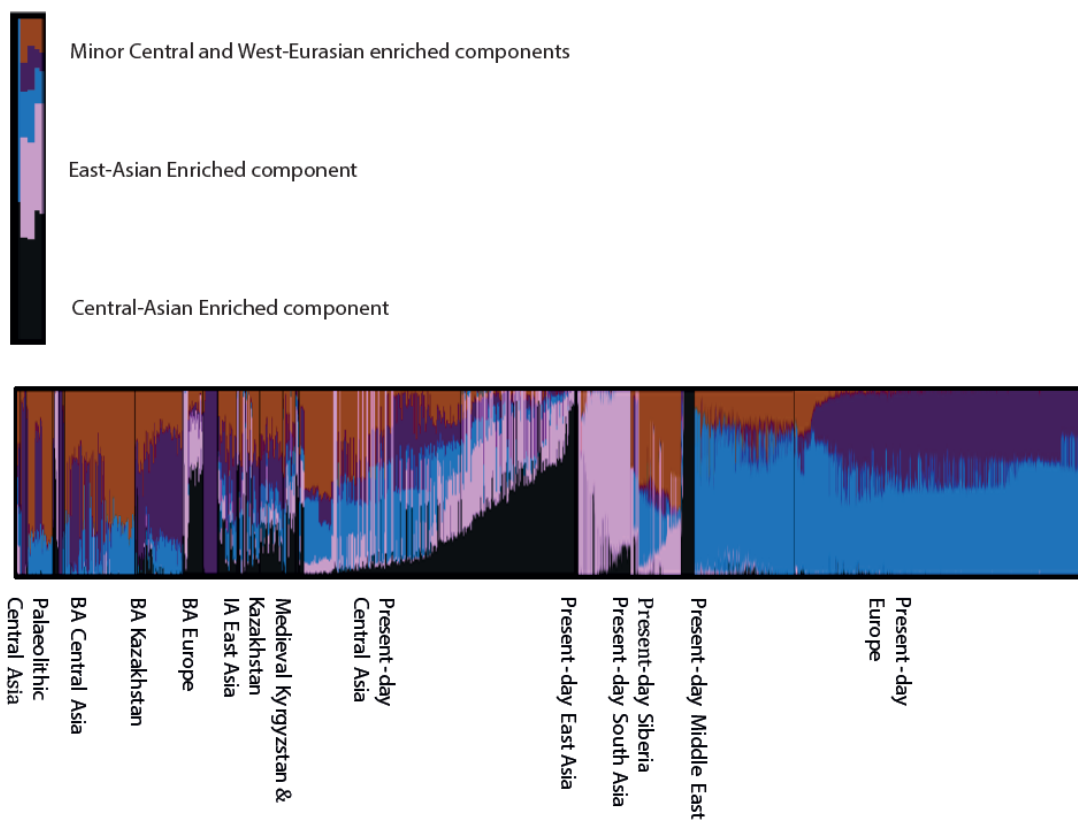

Figure S6. ADMIXTURE inferred clustering of present-day human populations and ancient Asian populations at K=5 where each column is an individual and the colour the cluster to which they are assigned. The Kuygenzhar individuals are enlarged and visualised at the top side of the figure.

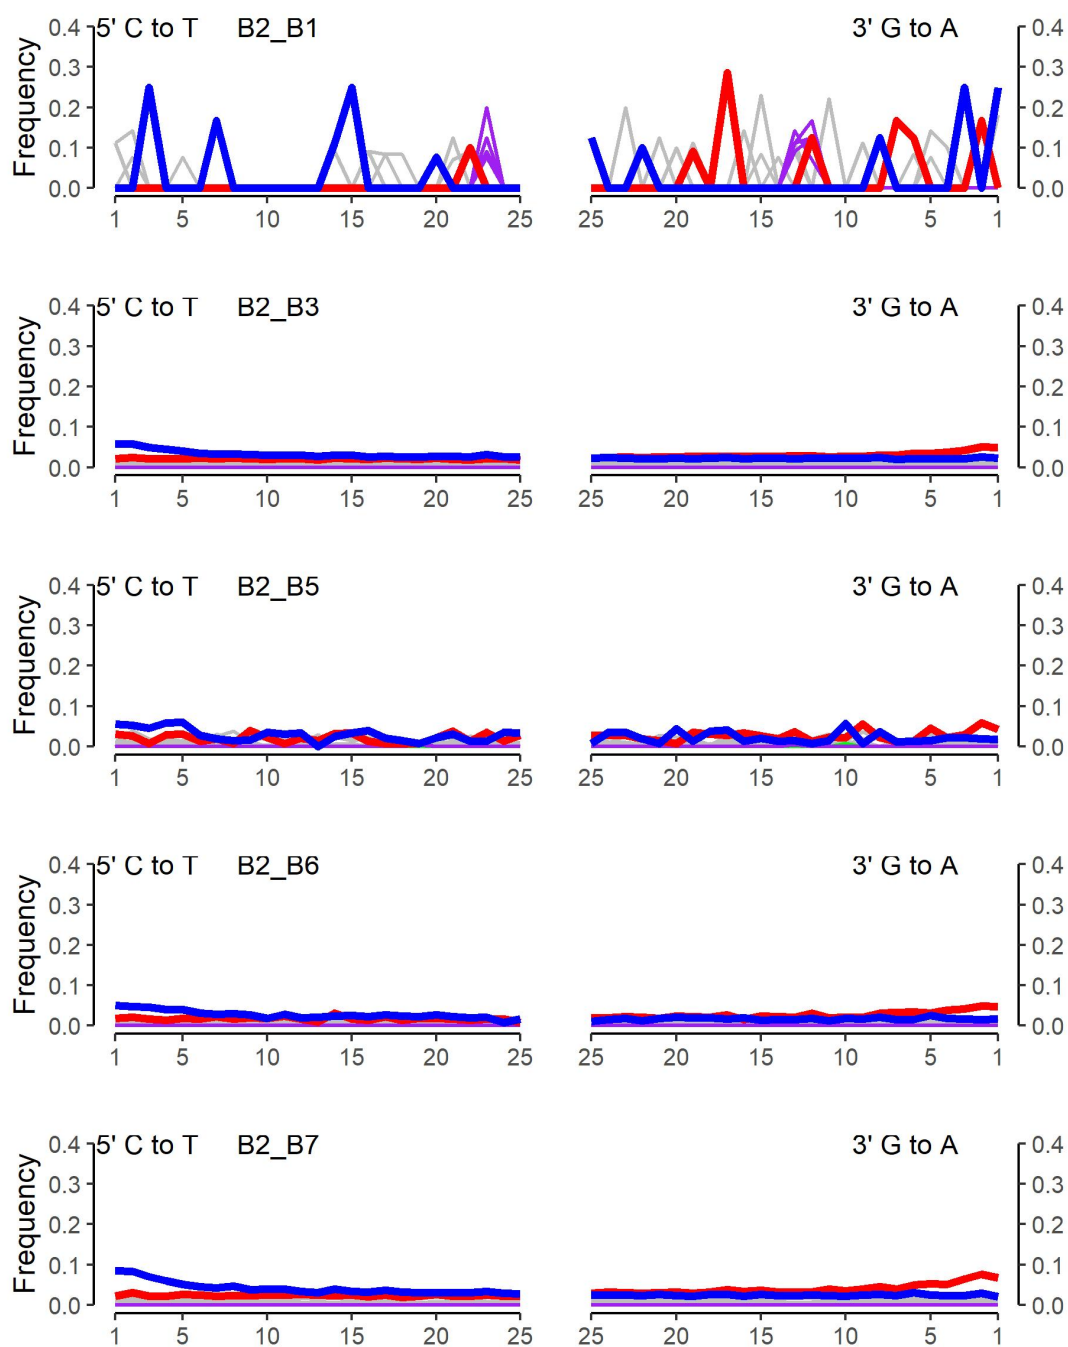

Figure S7. Frequency of aDNA damage patterns at the end of the reads mapped against *T. denticola* reference genome, with special emphasis in substitutions C to T in 5' end (blue) and G to A in 3' end (red). Individuals appear in the following order: B2\_B1, B2\_B3, B2\_B5, B2\_B6, B2\_B7.



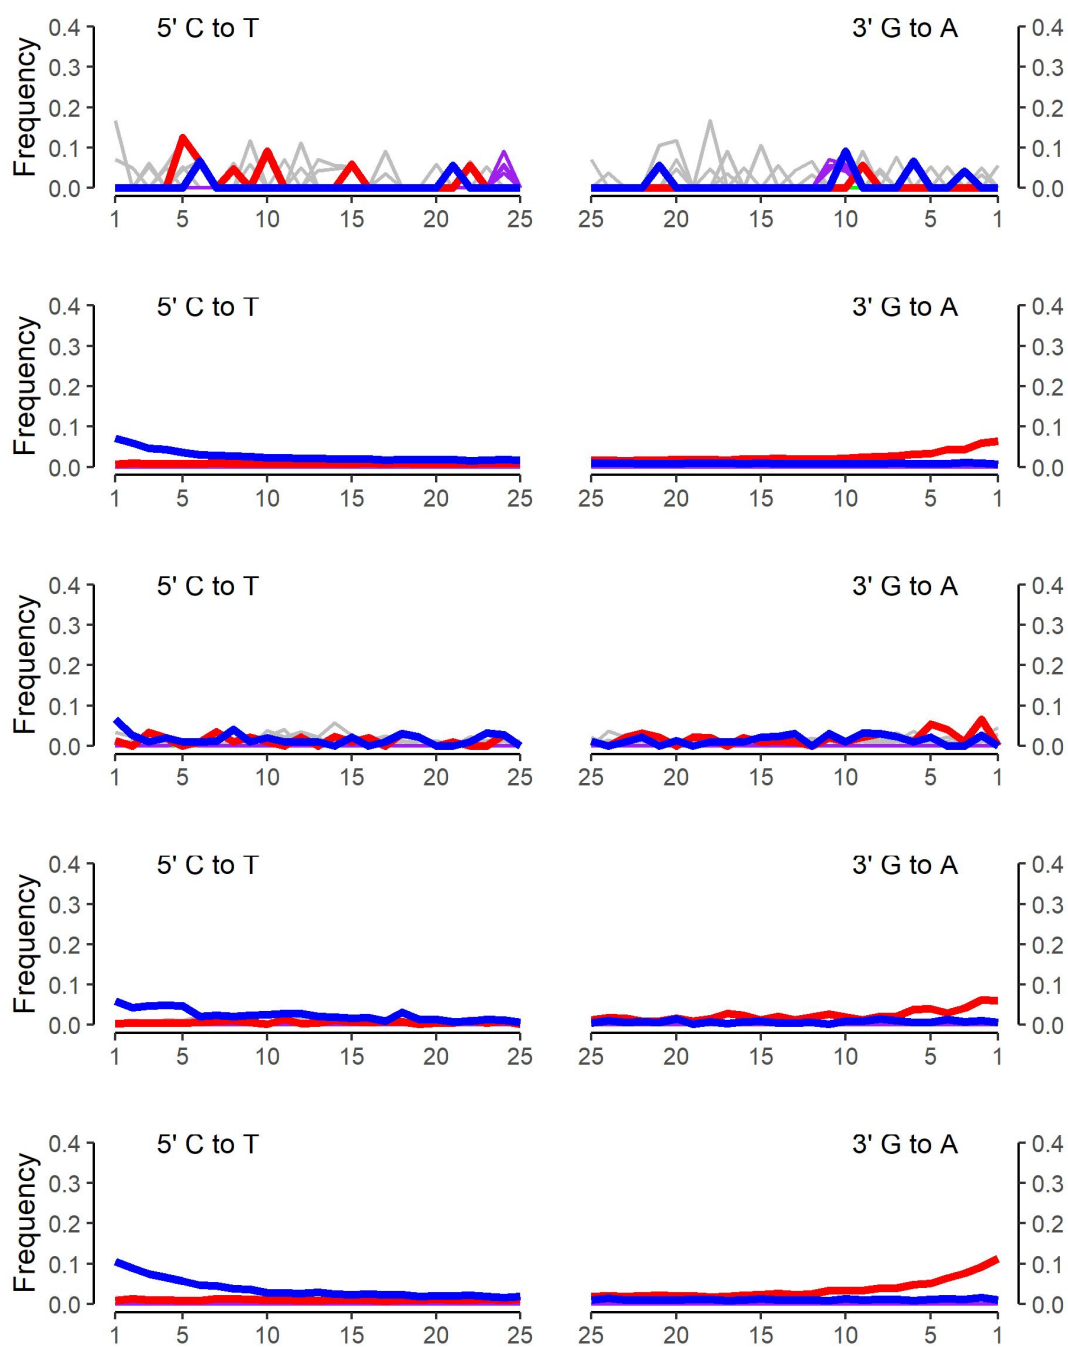

Figure S8. Frequency of aDNA damage patterns at the end of the reads mapped against *P. gingivalis* reference genome, with special emphasis in substitutions C to T in 5' end (blue) and G to A in 3' end (red). Individuals appear in the following order: B2\_B1, B2\_B3, B2\_B5, B2\_B6, B2\_B7.

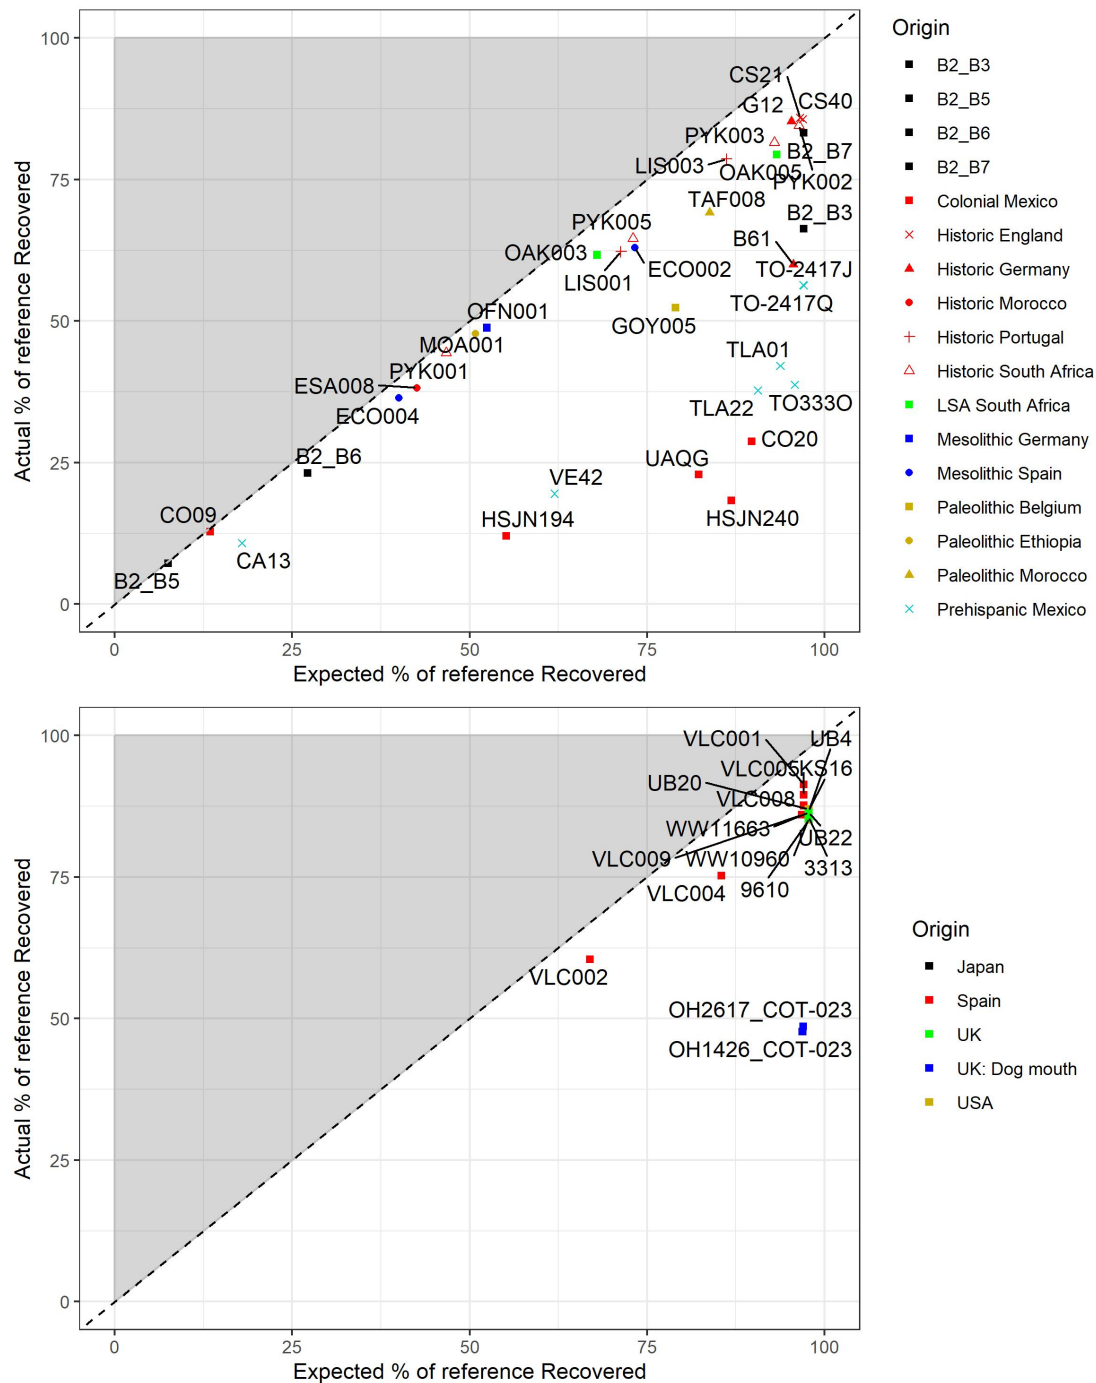

Figure S9. Differences in expected fraction of the reference covered given the length and abundance of reads from different samples. Note that there a cluster of Mexican and European ancient samples that have a retrieved coverage far lower than expected. B2\_B3, and dog samples coverage are also lower.

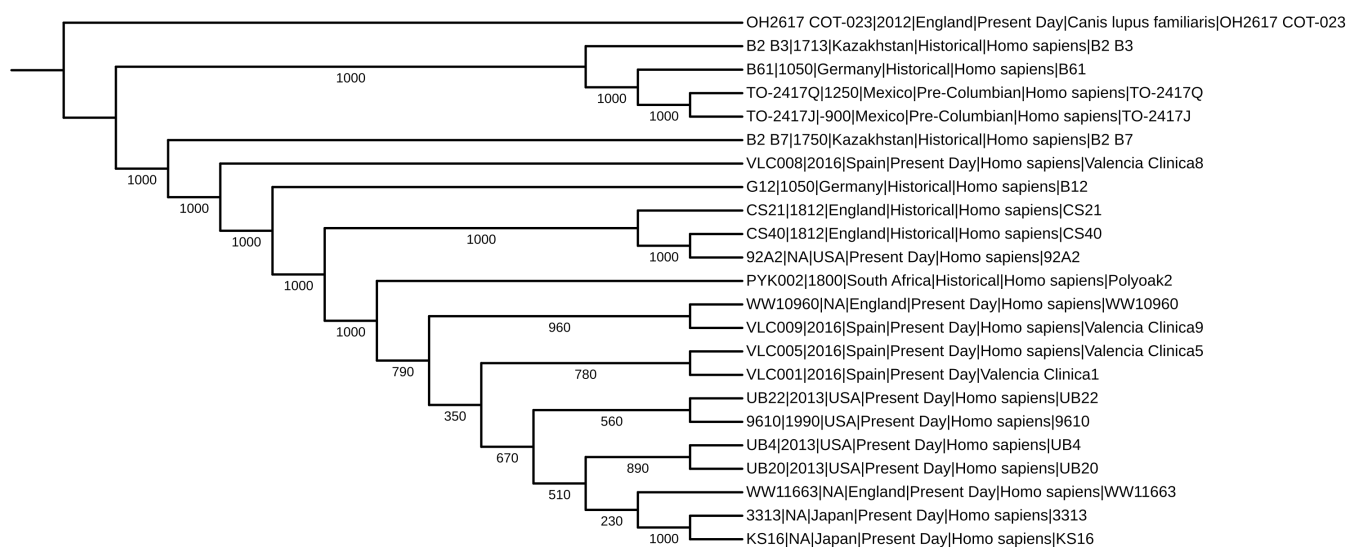

Figure S.10. High quality samples ML tree created with RAxML GTRGAMMA displaying bootstraps (N=1000) for each node. Branch length represented is not real.

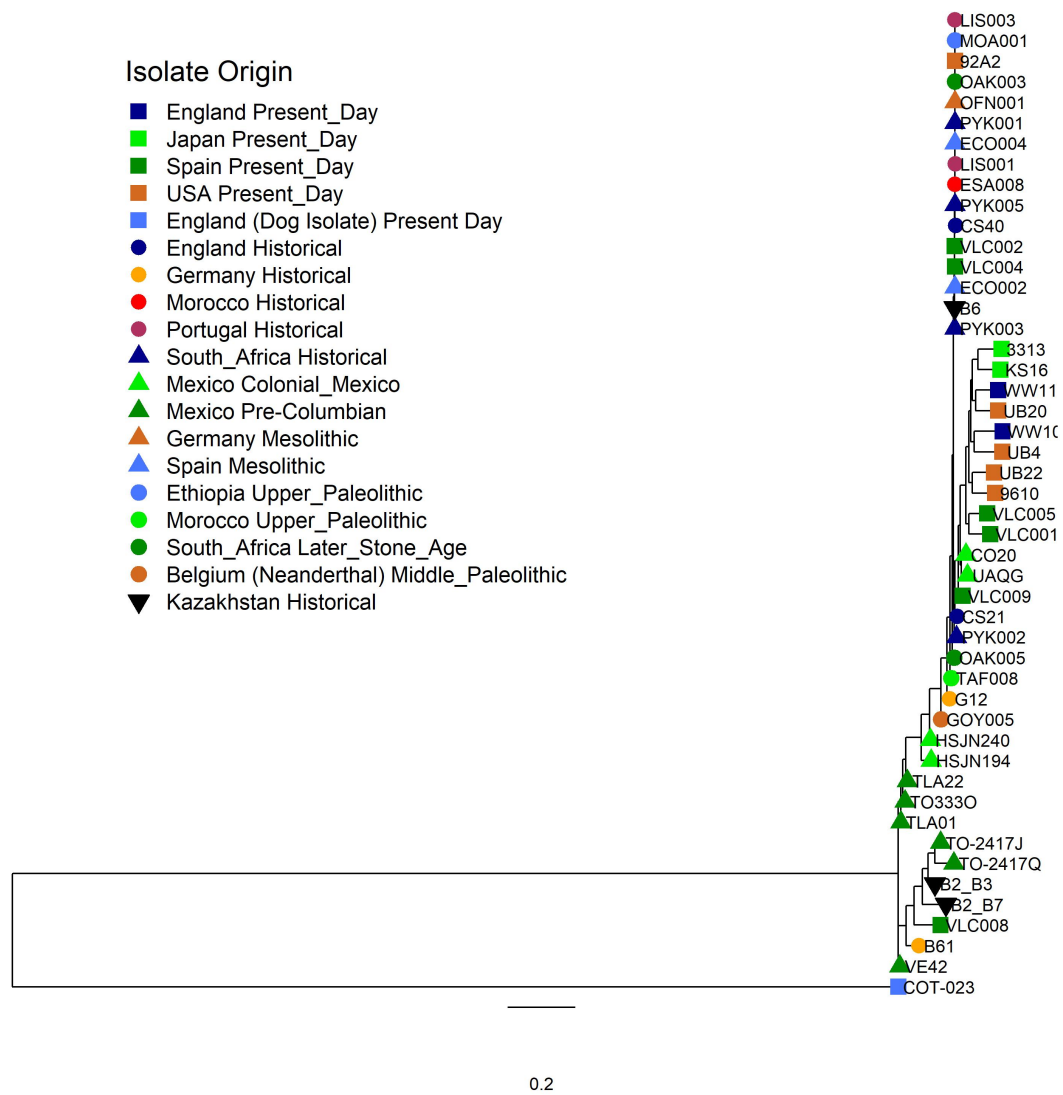

Figure S.11. ML tree created with RAxML GTRGAMMA, using High- and Low-Quality Samples and 100 bootstraps. The tree is rooted to a Dog isolate.

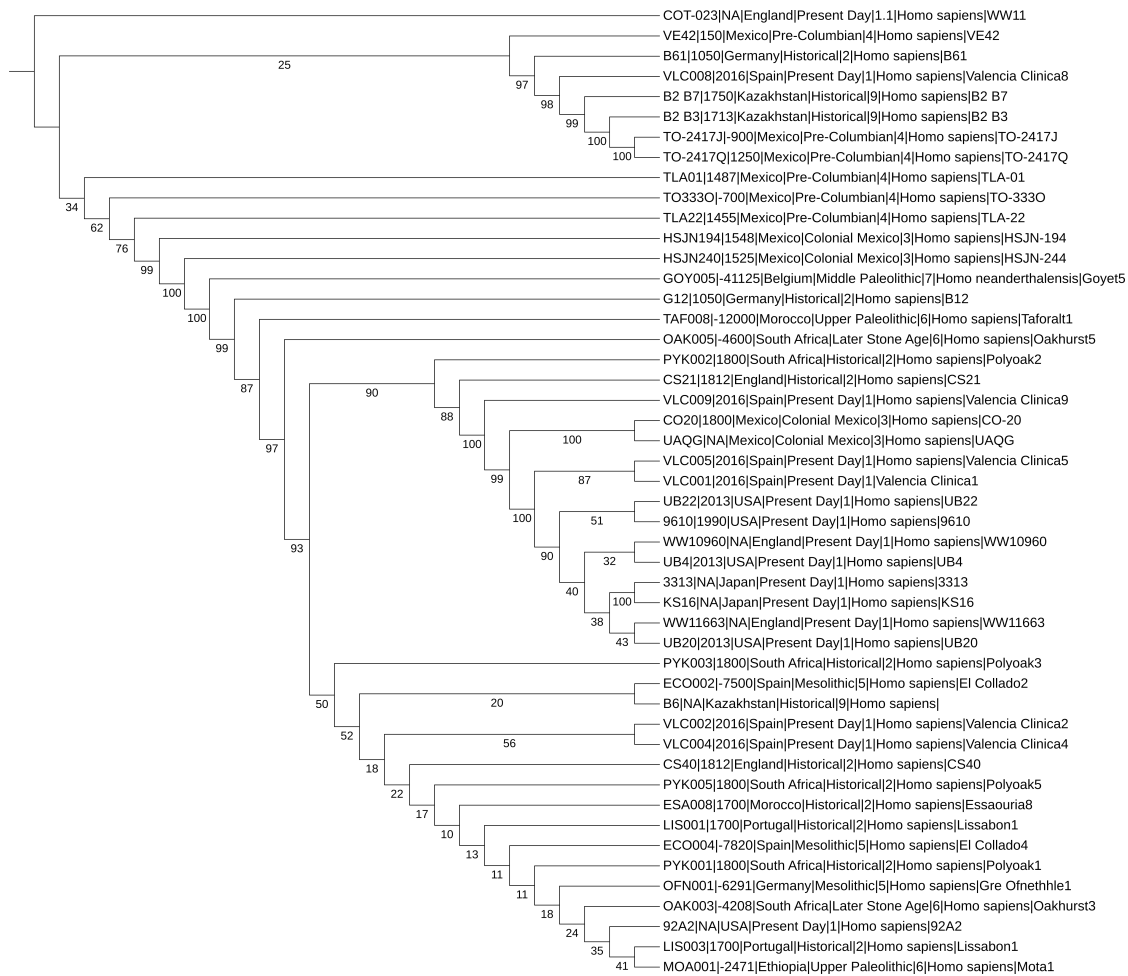

Figure S12. ML tree created with RAxML GTRGAMMA, using High- and Low-Quality Samples and 100 bootstraps. Branch length is ignored. Bootstraps are displayed for each node. The tree is rooted to a Dog isolate.

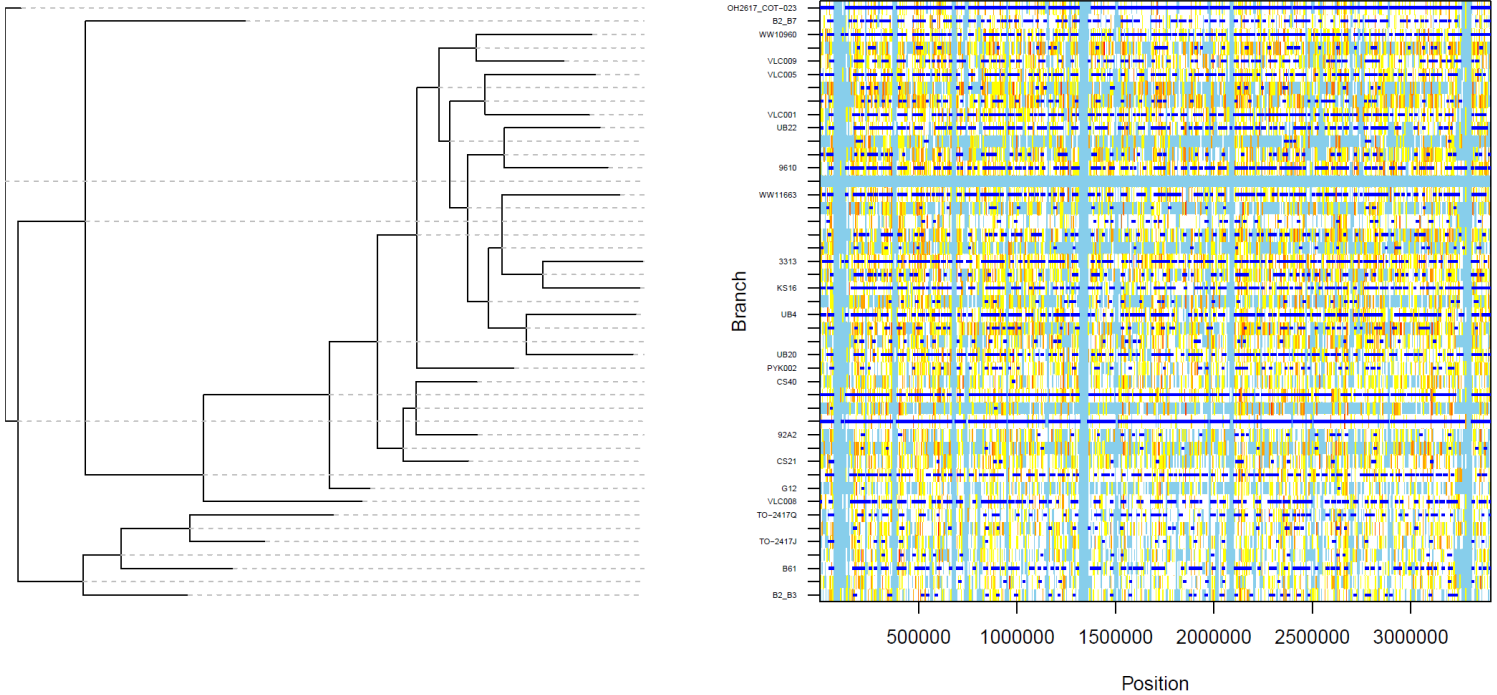

Figure S13. Analysis of recombinations present in the *Tannerella forsythia* alignment with the dog outgroup. Figure provides the ClonalFrameML inferred recombinant tracts with recombination corrected ML tree. The heatmap at right provides a representation of genomic events along the *T. forsythia* chromosome. Recombination tracts are marked as dark blue bars. White bars give non-homoplasic substitutions, while the bars ranging from yellow to red represent homoplasic sites (with a red value denoting a more homoplasic position). Most of the recombinant sites appear within the outgroup and within the node that splits modern diversity and the ancient Mexican clade.

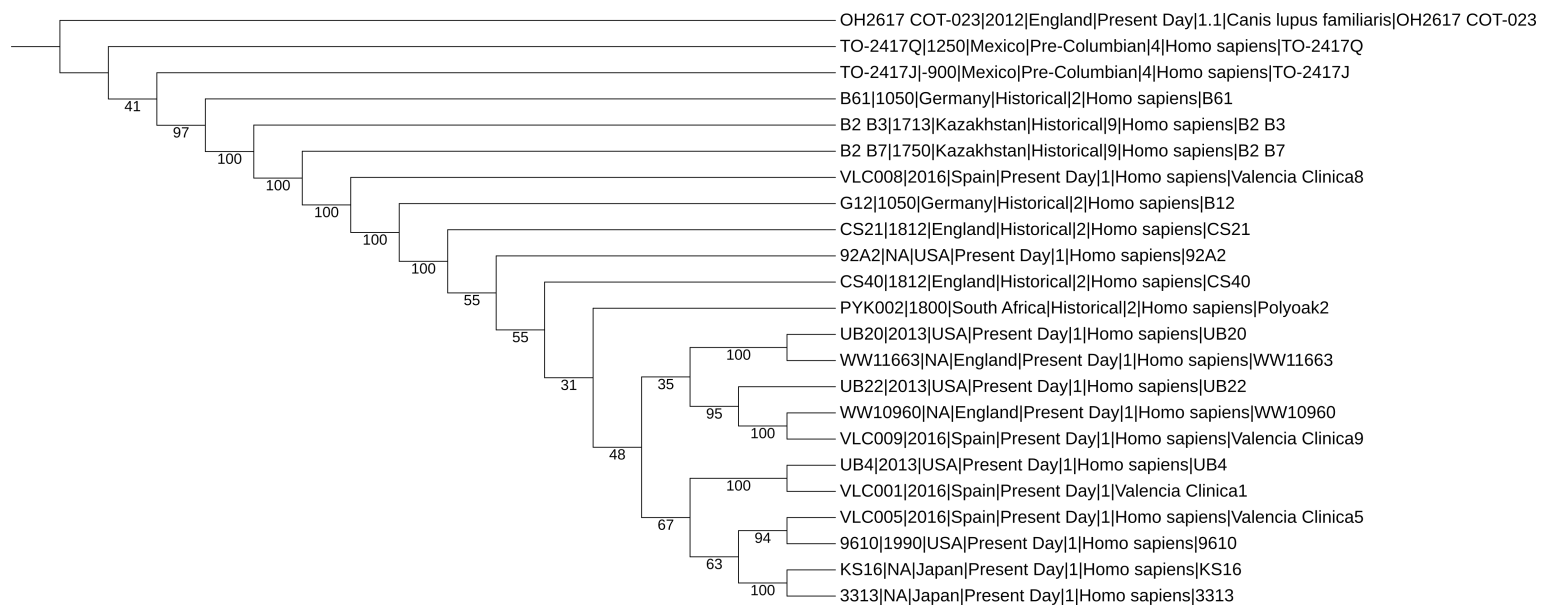

Figure S14. High quality samples ML tree created after recombination and homoplasy pruning. The final alignment used for the tree contained 1494 SNPs. The tree was created with RAxML GTRGAMMA displaying bootstraps for each node (N=100). Branch lengths are set to equal for visual purposes.

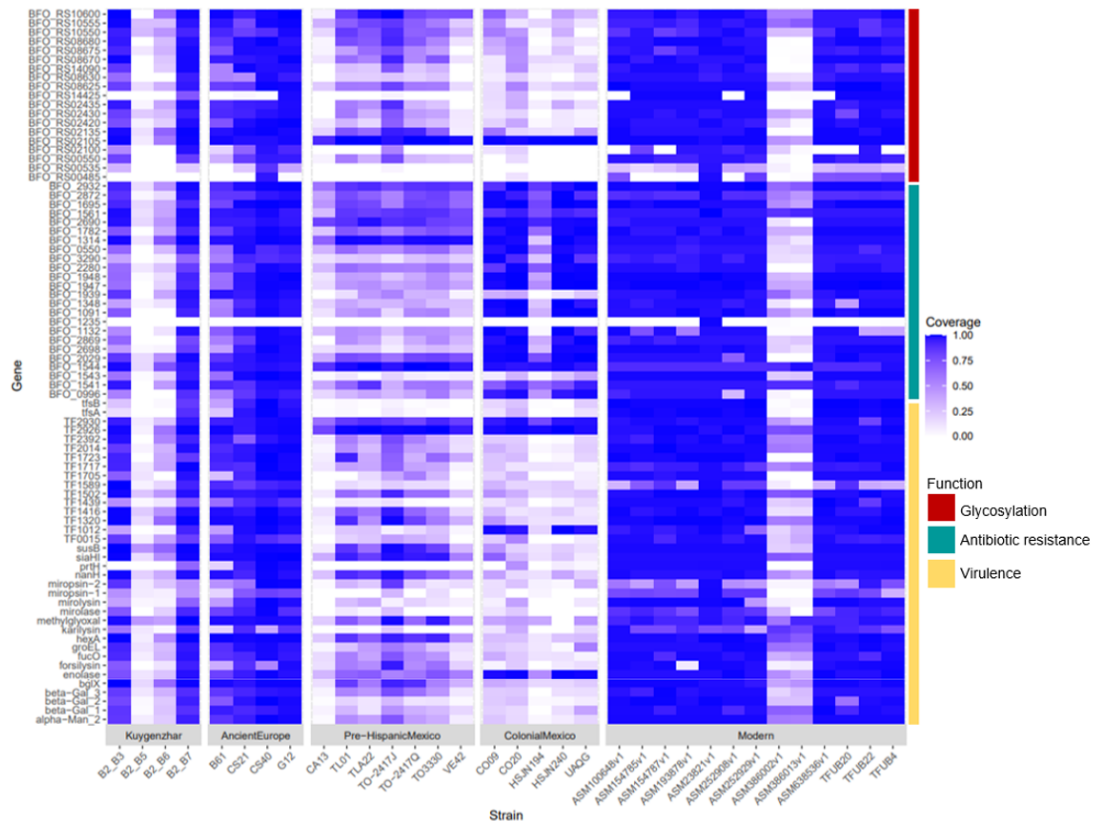

Figure S15: Heatmap displaying the coverage of glycosylation (red), antibiotic resistance (green) and virulence (yellow) genes for ancient Kuygenzhar, European and Mexican strains and modern strains of *Tannerella forsythia*.



Tree scale: 0.1

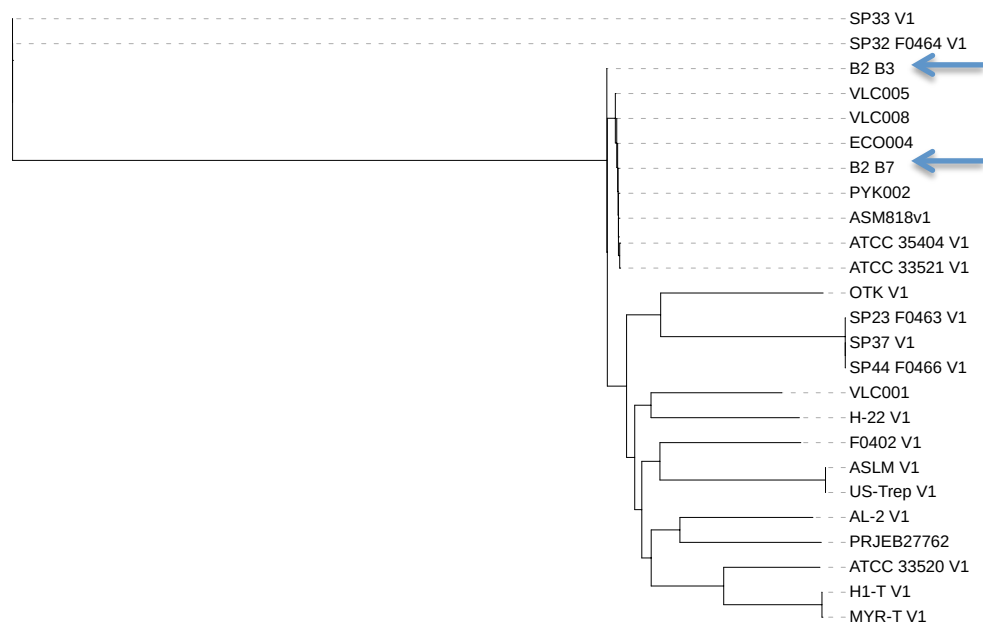

Figure S16: *T. denticola* tree created using 49,963 variant positions. Root was decided based on the NCBI blast-generated dendrogram. Includes samples in this study (B2-B3 and B2-B7) (blue arrows), in Yates et al 2021 (VLC005, VLC008, ECO004 and VLC001), and published assemblies (the rest, their ID are in the tree labels).

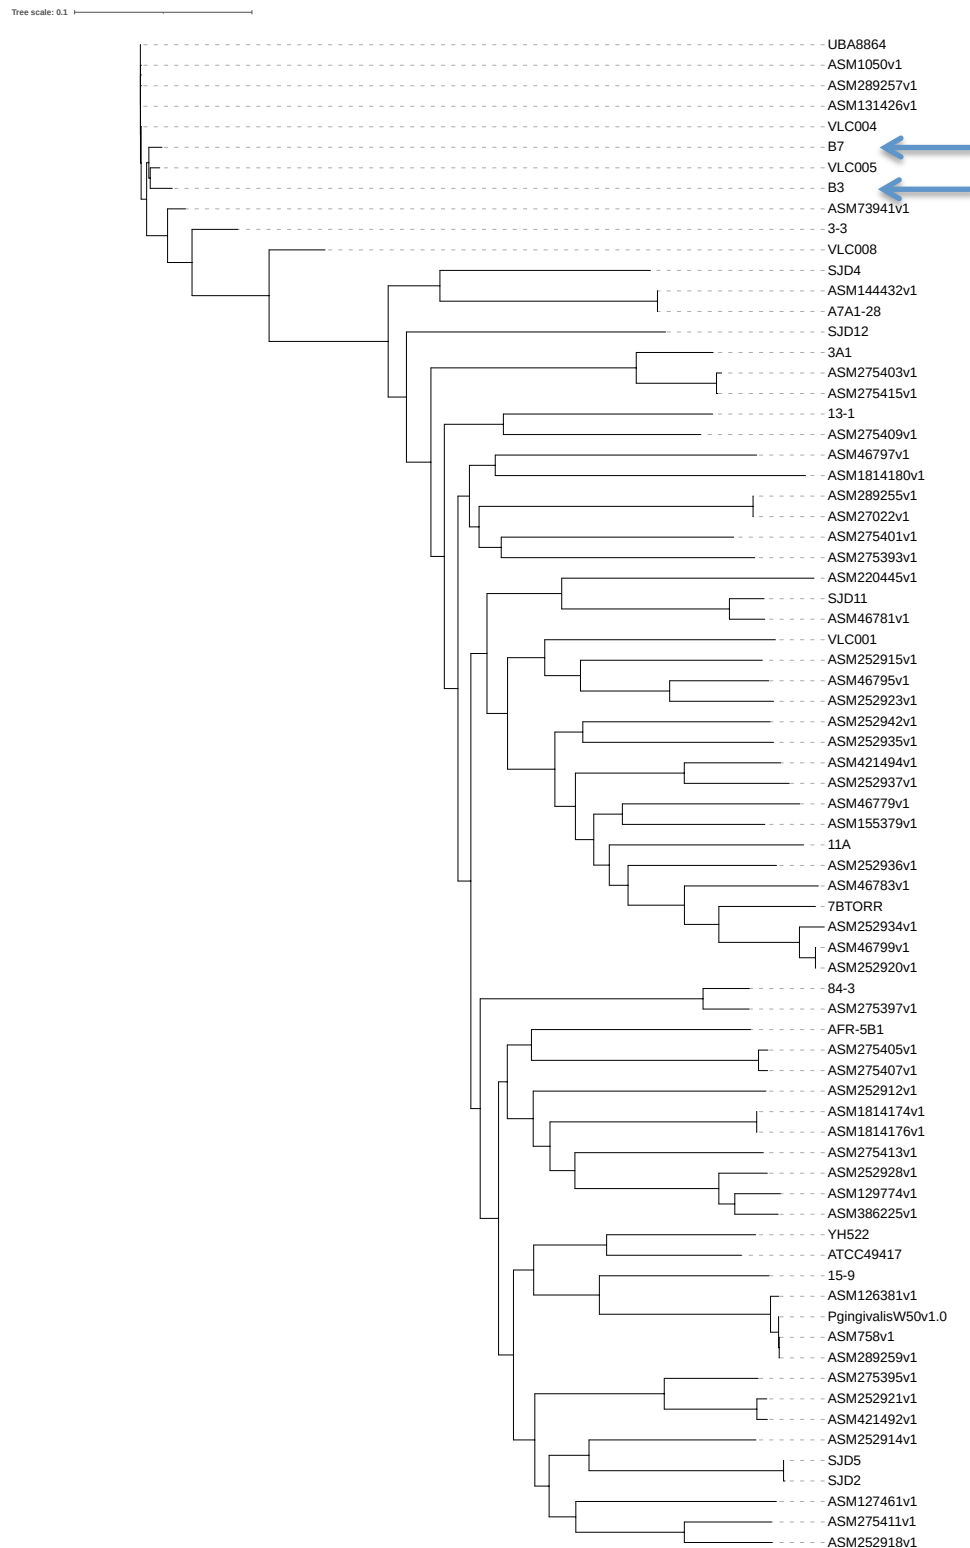

Figure S17: *P. gingivalis* tree created using 88,495 variant positions. Root was decided based on the NCBI blast-generated dendrogram. Includes samples in this study (B2-B3 and B2-B7), in Yates et al 2021 (VLC005, VLC008, VLC004 and VLC001), and published assemblies (the rest, their ID are in the tree labels). Blue arrows mark the Kuygenzhar individuals.
